# Supplementary material for: Coordination environment dominated catalytic selectivity of photocatalytic hydrogen and oxygen reduction over switchable gallium and nitrogen active sites
Source: Royal Society of Chemistry journal article supplement (doi:10.1039/d3ta07951a), 2024-01-01
Supplement: d3ta07951a1.pdf [file d3ta07951a1.pdf]

## Supporting information

### **Coordination environment dominated catalytic selectivity of photocatalytic hydrogen and oxygen reduction over switchable gallium and nitrogen active sites**

*Chunqiang Zhuang<sup>a</sup>, Weiming Li<sup>a</sup>, Yuan Chang<sup>b</sup>, Shijie Li<sup>\*c</sup>, Yihong Zhang<sup>a</sup>, Yuanli Li<sup>a</sup>, Junfeng Gao<sup>b\*</sup>, Ge Chen<sup>c</sup>, and Zhenhui Kang<sup>d,e\*</sup>*

*<sup>a</sup> Faculty of Materials and Manufacturing, Beijing University of Technology, Beijing 100124, China*

*<sup>b</sup> State Key Laboratory of Structural Analysis, Optimization and CAE Software for Industrial Equipment, Dalian University of Technology, Dalian 116024, P. R. China*

*<sup>c</sup> Key Laboratory of Health Risk Factors for Seafood of Zhejiang Province, National Engineering Research Center for Marine Aquaculture, College of Marine Science and Technology, Zhejiang Ocean University, Zhoushan 316022, Zhejiang, China.*

*<sup>d</sup> Beijing Key Laboratory for Green Catalysis and Separation, Faculty of Environment and Life, Beijing University of Technology, Beijing 100124, PR China*

*<sup>e</sup> Institute of Functional Nano and Soft Materials (FUNSOM), Jiangsu Key Laboratory for Carbon-based Functional Materials and Devices, Soochow University, Suzhou 215123, China*

*<sup>f</sup> Macao Institute of Materials Science and Engineering (MIMSE), MUST–SUDA Joint Research Center for Advanced Functional Materials, Macau University of Science and Technology, Taipa 999078, Macao*

Corresponding author:

[gaojf@dlut.edu.cn](mailto:gaojf@dlut.edu.cn); [zhkang@suda.edu.cn](mailto:zhkang@suda.edu.cn); [lishijie@zjou.edu.cn](mailto:lishijie@zjou.edu.cn)

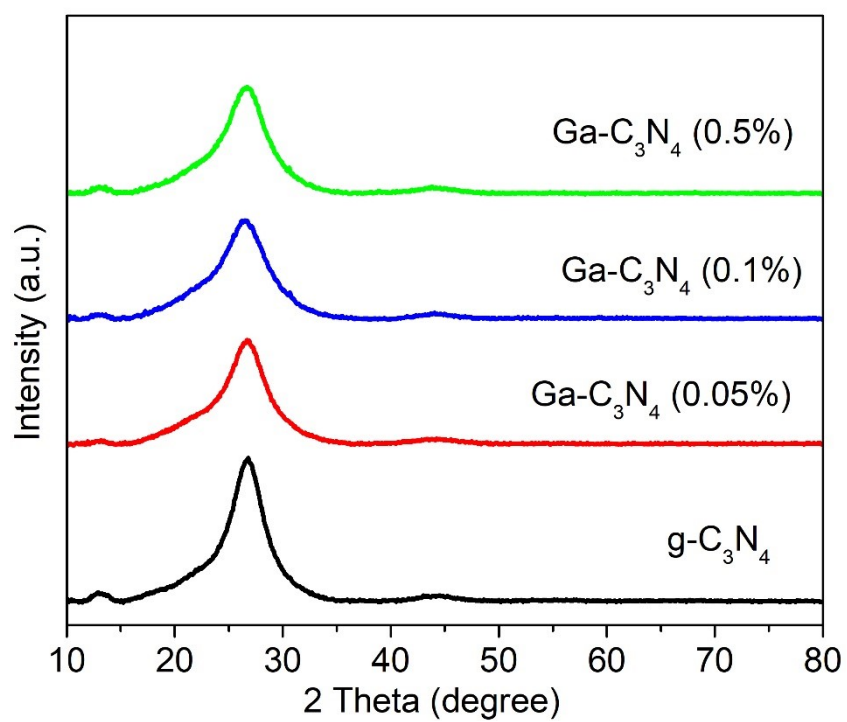

**Figure S1.** XRD patterns of pure C<sub>3</sub>N<sub>4</sub> and Ga-coordinated C<sub>3</sub>N<sub>4</sub> samples.

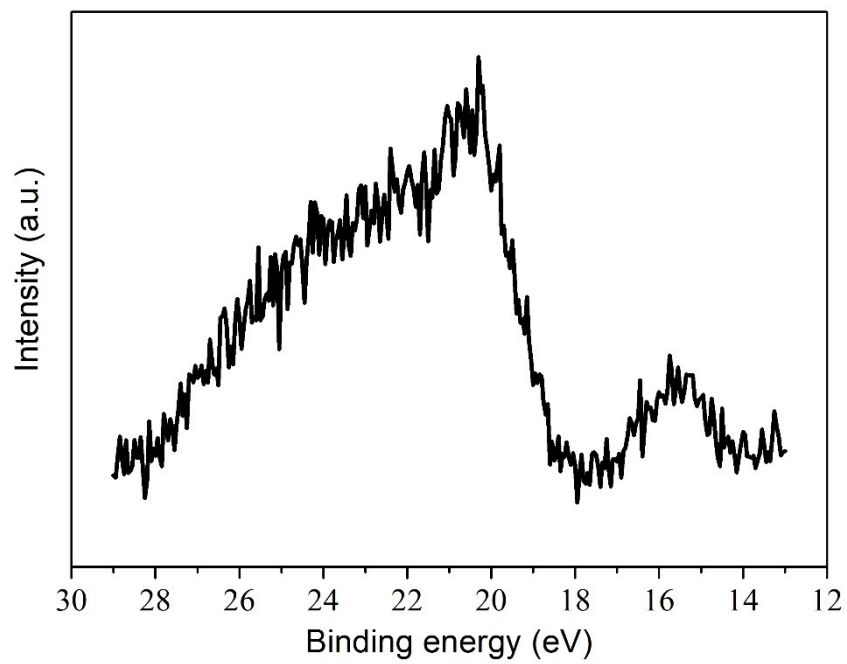

**Figure S2.** High-resolution XPS of Ga<sub>3d</sub> in the Ga-C<sub>3</sub>N<sub>4</sub> sample.

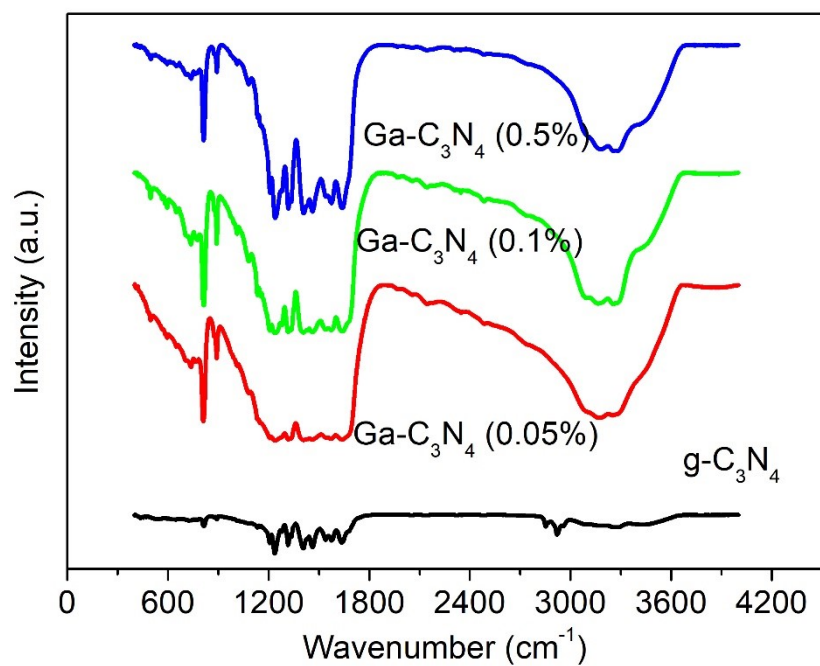

**Figure S3.** FTIR spectra of pure C<sub>3</sub>N<sub>4</sub> and Ga-coordinated C<sub>3</sub>N<sub>4</sub> samples.

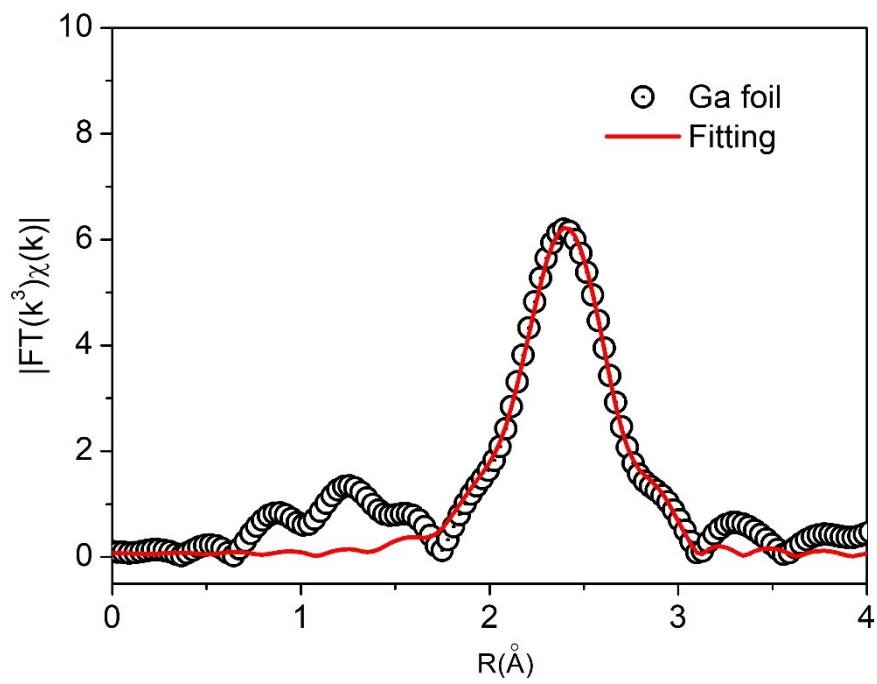

**Figure S4.** Fitted FT-EXAFS curve at  $R$  space for Ga foil.

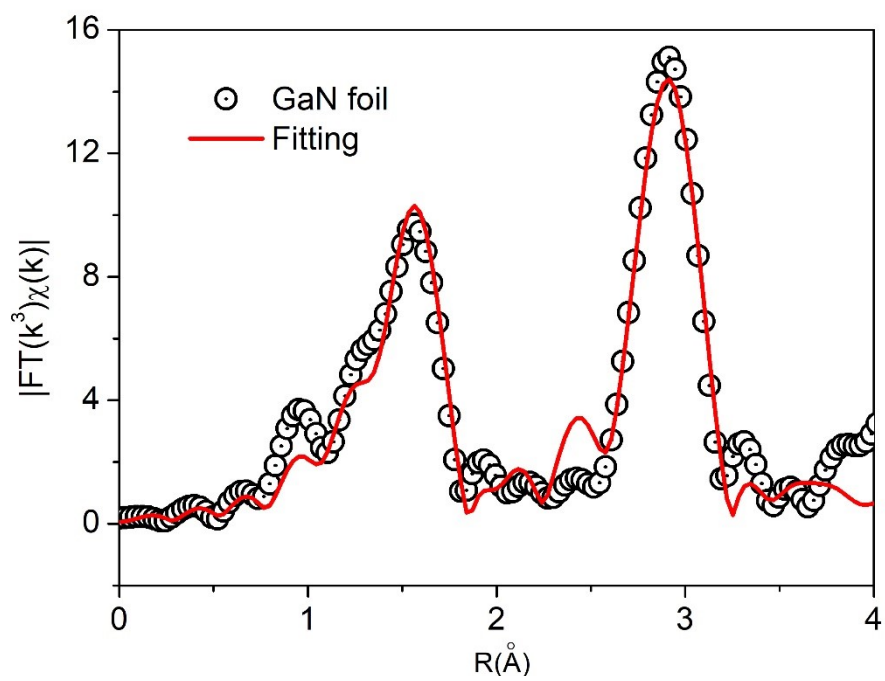

**Figure S5.** Fitted FT-EXAFS curve at  $R$  space for GaN reference.

**Table S1.** Fitting parameters of Ga K-edge EXAFS of Ga-doped g-C<sub>3</sub>N<sub>4</sub> nanosheets and reference samples.

| Sample  | Shell  | CN  | R (Å) | $\sigma^2(\text{Å}^2)$ | $\Delta E^0$ (eV) | $S_0^2$ |
|---------|--------|-----|-------|------------------------|-------------------|---------|
| Ga_1    | Ga-N   | 3.9 | 1.95  | 0.010                  | 3.3               | 0.99    |
| Ga_2    | Ga-N   | 5.0 | 1.95  | 0.009                  | 3.3               | 0.99    |
| Ga_3    | Ga-N   | 5.9 | 1.95  | 0.010                  | 3.8               | 0.99    |
| Ga foil | Ga-Ga1 | 1   | 2.60  | 0.006                  | 6.3               | 0.99    |
|         | Ga-Ga2 | 2   | 2.72  | 0.005                  | 6.3               | 0.99    |
|         | Ga-Ga3 | 2   | 2.82  | 0.011                  | 6.3               | 0.99    |
|         | Ga-Ga4 | 2   | 2.83  | 0.011                  | 6.3               | 0.99    |
| GaN     | Ga-N   | 4   | 1.95  | 0.004                  | 3.9               | 0.99    |
|         | Ga-Ga  | 12  | 3.22  | 0.012                  | 3.9               | 0.99    |

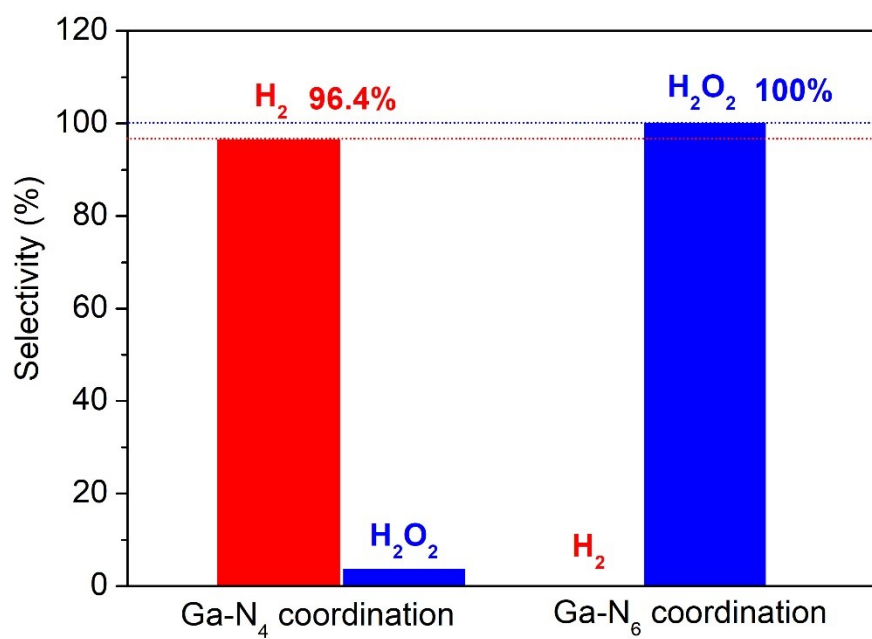

**Figure S6.** Photocatalytic selectivity of Ga-N<sub>4</sub> and Ga-N<sub>6</sub> coordinated C<sub>3</sub>N<sub>4</sub> samples.



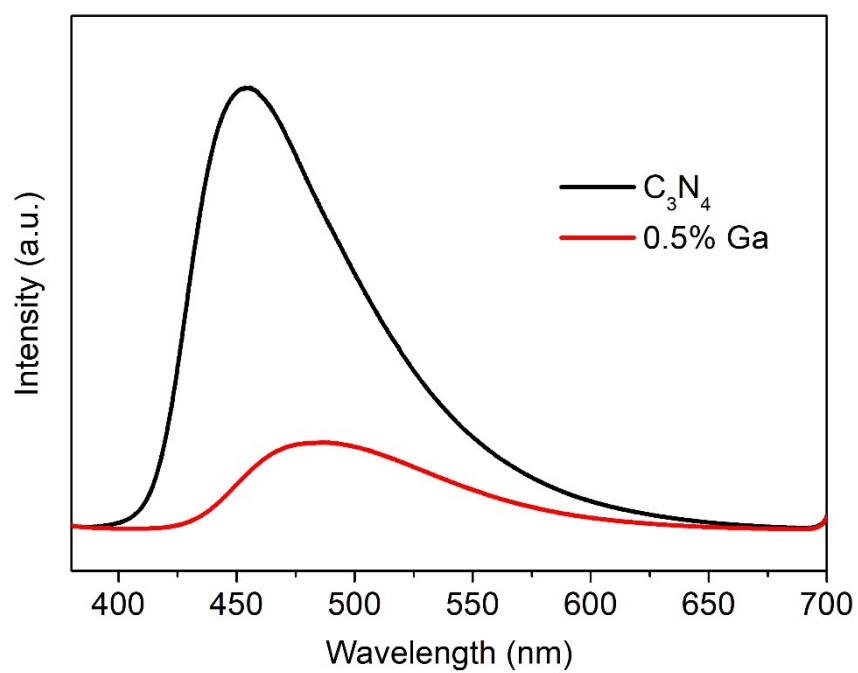

**Figure S7.** PL spectra of pure  $C_3N_4$  and Ga-coordinated  $C_3N_4$  samples.

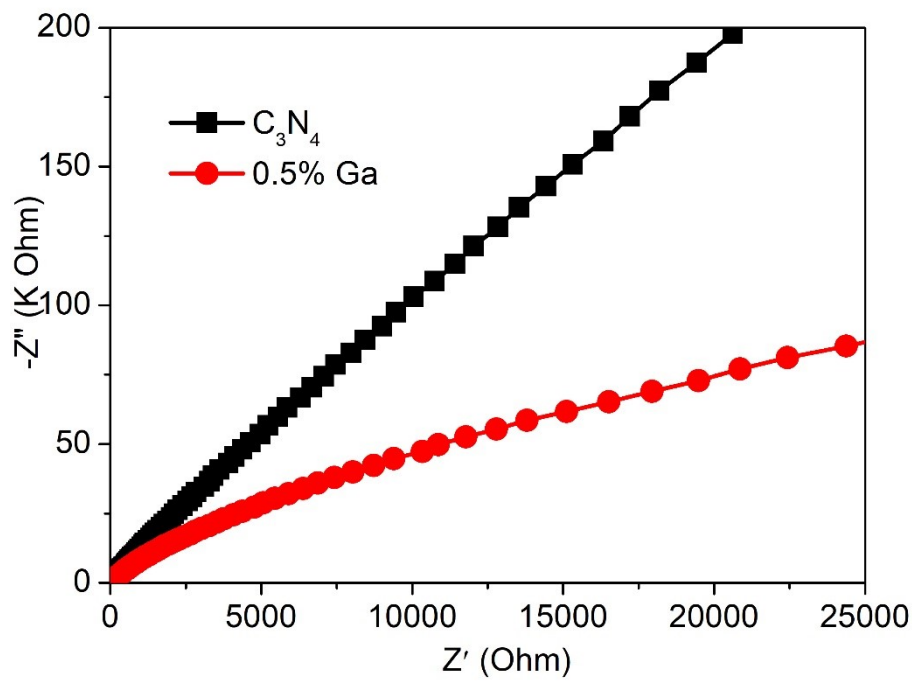

**Figure S8.** EIS spectra of pure  $C_3N_4$  and Ga-coordinated  $C_3N_4$  samples.

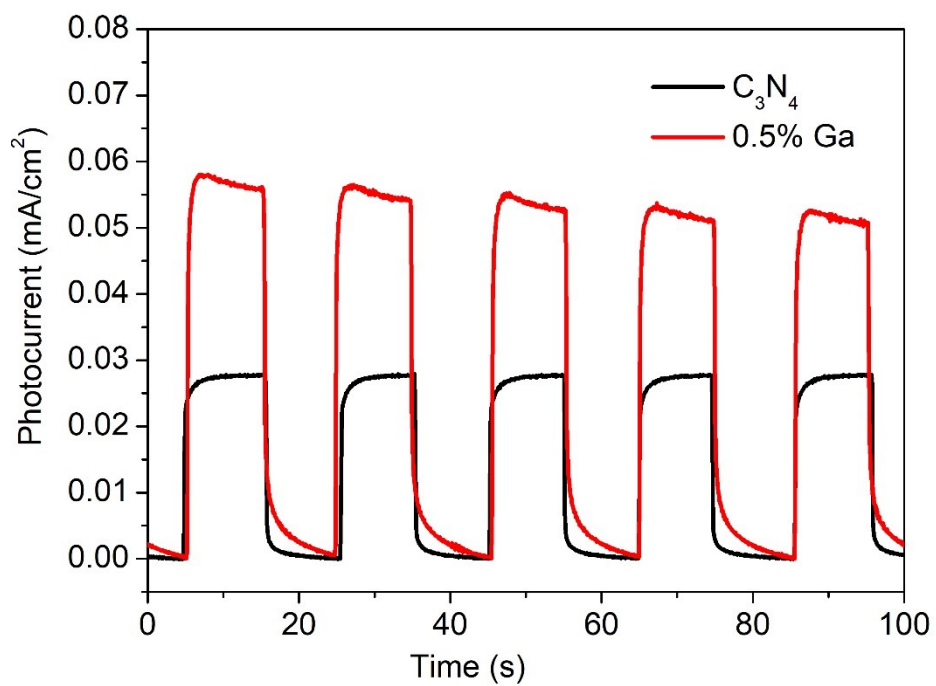

**Figure S9.** Transient photocurrent curves of pure C<sub>3</sub>N<sub>4</sub> and Ga-coordinated C<sub>3</sub>N<sub>4</sub> samples.

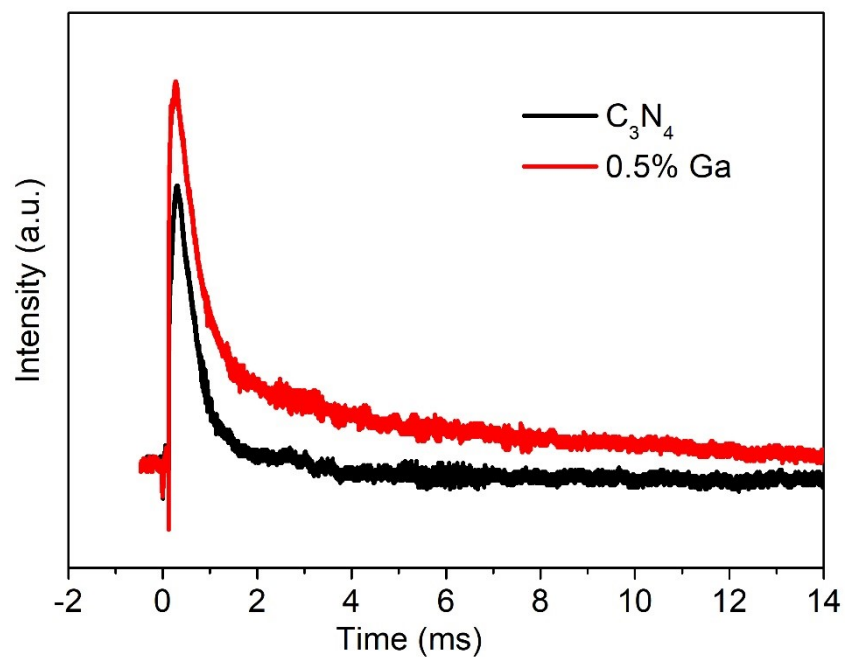

**Figure S10.** TPV spectra of pure  $C_3N_4$  and Ga-coordinated  $C_3N_4$  samples.

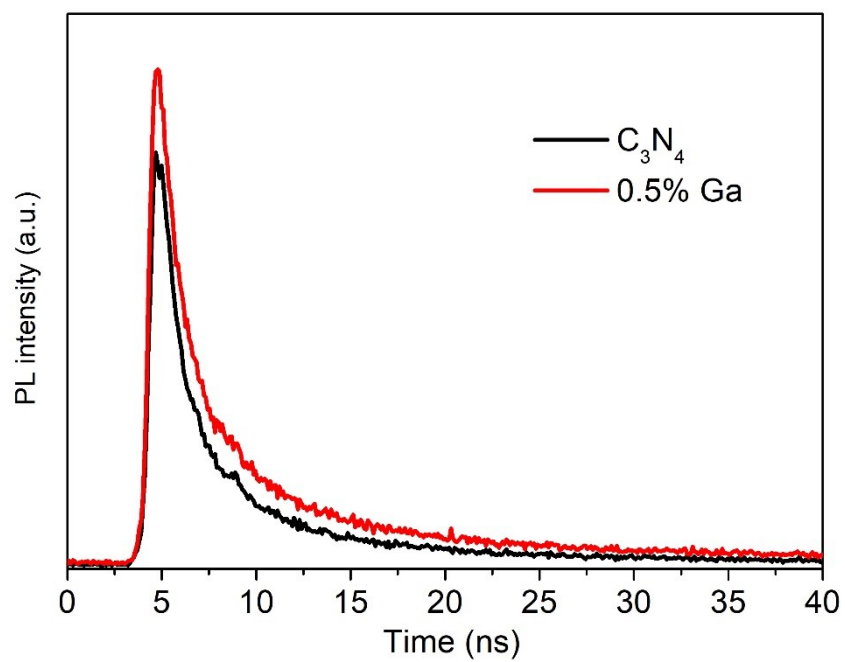

**Figure S11.** Time-resolved PL spectra of pure  $C_3N_4$  and Ga-coordinated  $C_3N_4$  samples.

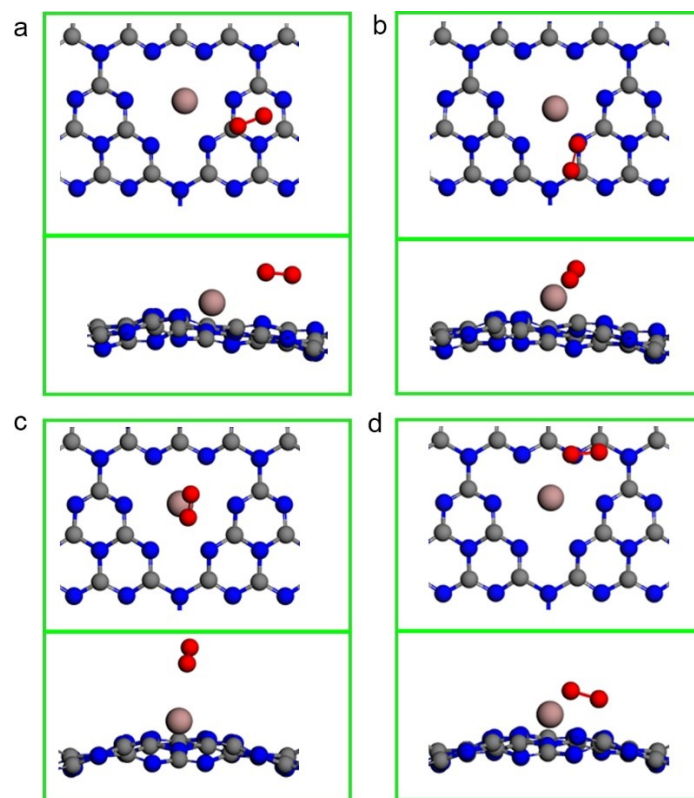

**Figure S12.** (a)  $O_2$  adsorption on C sites (0.822 eV). (b)  $O_2$  adsorption on N sites (0.522 eV). (c)  $O_2$  adsorption on Ga sites (0.898 eV). (d)  $O_2$  adsorption on N sites (0.556 eV).

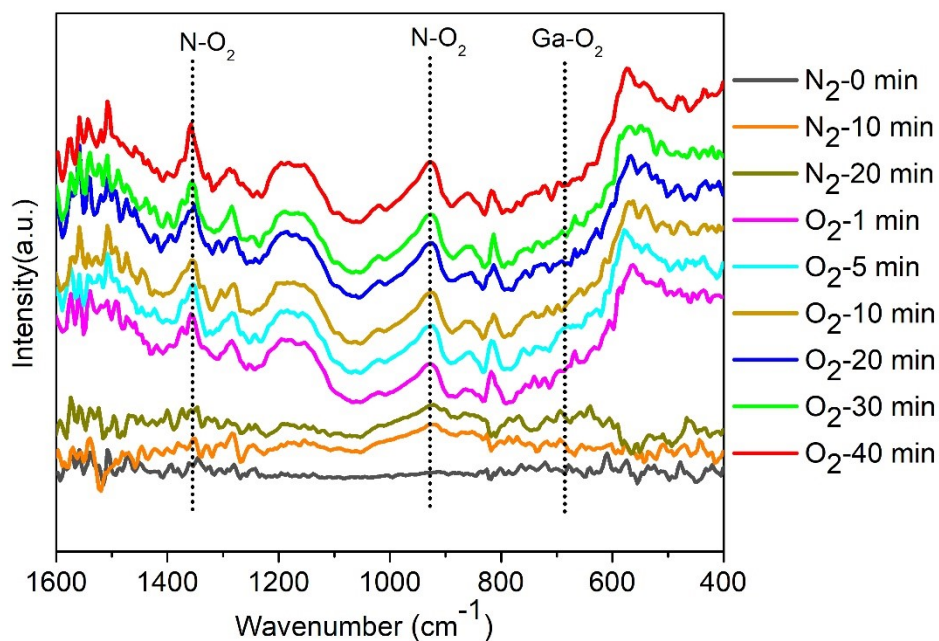

**Figure S13.** In-situ diffuse reflectance infrared transform spectra of the Ga-N<sub>6</sub> coordinated sample under N<sub>2</sub> and O<sub>2</sub>/H<sub>2</sub>O condition.

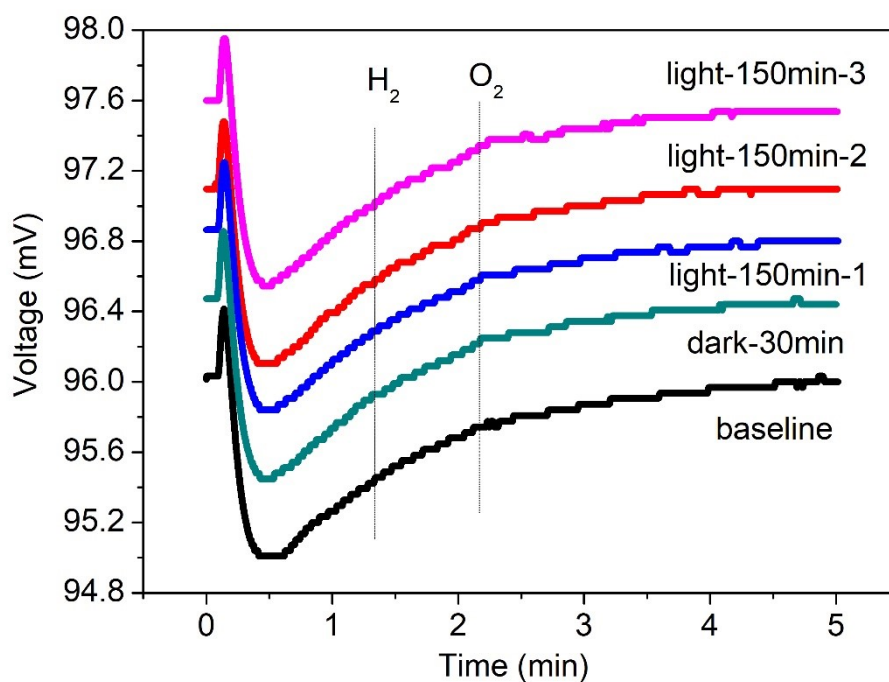

**Figure S14.** Detection of H<sub>2</sub>/O<sub>2</sub> signals by GC-TCD. The baseline curve was shown for reference. The gas in the reactor was kept for 30 min under dark condition to realize the adsorption-desorption equilibrium, and then was detected by GC-TCD. Light-150min-1/2/3 denotes that the photocatalytic process was performed under light irradiation for 150 min, and then the gas in the reactor was collected and examined by GC-TCD for three times.

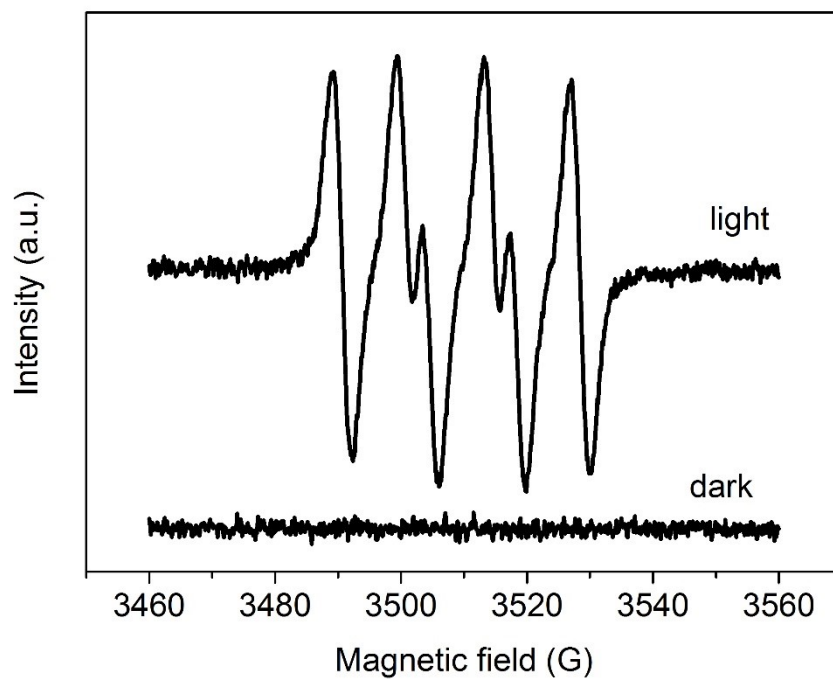

**Figure S15.** Superoxide radicals under dark condition and under light irradiation.

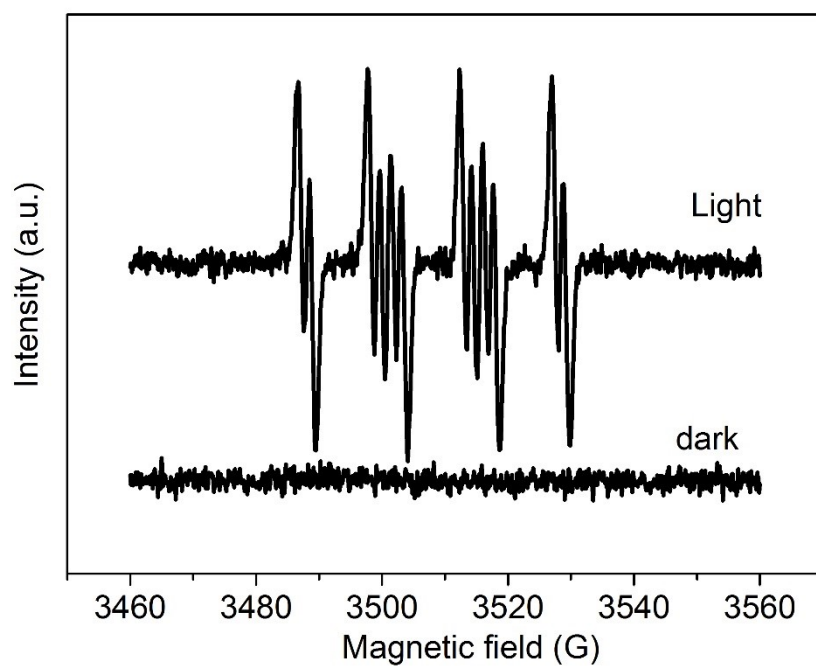

**Figure S16.**  $\bullet$ OOH radicals under dark condition and under light irradiation.
